# Supplementary material for: Grindability of Torrefied Camelina Straw and Microparticle Evaluation by Confocal Laser Scanning Microscopy for Use as Biofuel
Source: MDPI journal article supplement (doi:10.3390/fuels5020009), 2024-04-11
Supplement: s1 [file s1]

**Table S1** Analysis of variance response variables and *p*-values for solid yield, moisture content, ash content, geometric mean diameter, bulk density, and particle density with the significance of the process variables (torrefaction temperature, sample, and residence time).

| Response parameter                    | Sample | CV (%) | <i>R</i> <sup>2</sup> |           |          | <i>p</i> -value |         |          |
|---------------------------------------|--------|--------|-----------------------|-----------|----------|-----------------|---------|----------|
|                                       |        |        | Actual                | Predicted | Adjusted | TT (°C)         | BB      | RT (min) |
| Solid yield (%)                       | CS     | 2.82   | 0.989                 | 0.949     | 0.979    | <0.0001         | <0.0001 | <0.0001  |
|                                       | CS-C   | 3.74   | 0.986                 | 0.946     | 0.973    | <0.0001         | <0.0001 | <0.0001  |
| Moisture content (% d.b.)             | CS     | 3.30   | 0.971                 | 0.882     | 0.945    | 0.0030          | <0.0001 | <0.0001  |
|                                       | CS-C   | 2.15   | 0.987                 | 0.954     | 0.975    | <0.0001         | <0.0001 | <0.0001  |
| Ash content (% d.b.)                  | CS     | 5.45   | 0.958                 | 0.845     | 0.921    | 0.0010          | <0.0001 | 0.0010   |
|                                       | CS-C   | 6.13   | 0.970                 | 0.891     | 0.943    | <0.0001         | <0.0001 | 0.0010   |
| <i>d</i> <sub>gw</sub> (mm)           | CS     | 1.90   | 0.979                 | 0.929     | 0.960    | <0.0001         | <0.0001 | <0.0001  |
|                                       | CS-C   | 0.68   | 0.994                 | 0.973     | 0.988    | <0.0001         | <0.0001 | <0.0001  |
| Bulk density (kg/m <sup>3</sup> )     | CS     | 3.11   | 0.997                 | 0.986     | 0.993    | 0.7580          | 0.0040  | 0.6710   |
|                                       | CS-C   | 2.90   | 0.996                 | 0.984     | 0.993    | <0.0001         | <0.0001 | <0.0001  |
| Particle density (kg/m <sup>3</sup> ) | CS     | 1.80   | 0.959                 | 0.792     | 0.923    | 0.1250          | 0.0050  | 0.0420   |
|                                       | CS-C   | 1.80   | 0.969                 | 0.856     | 0.941    | <0.0001         | <0.0001 | 0.5790   |

CS: camelina straw ground in 6.4 mm sieve; CS-C: chopped camelina straw; CV: coefficient of variation; *R*<sup>2</sup>: correlation coefficient; TT: torrefaction temperature; RT: residence time; BB: biomass-biochar (the first number after torrefied biomass (T) is % CS, and the second is % of with or without biochar); and *d*<sub>gw</sub>: geometric mean diameter.

**Table S2** Multiple regression equations generated by RSM software for each response.

| Response variables          | Sample | Multiple regression equation                                                                  | Adequate precision |
|-----------------------------|--------|-----------------------------------------------------------------------------------------------|--------------------|
| SY (%)                      | CS     | $56.35 - 3.62A - 11.60B - 4.46C - 1.71AB + 1.21AC - 0.77BC + 8.90B^2 - 0.53C^2$               | 31.93              |
|                             | CS-C   | $57.20 - 5.22A - 13.91B - 4.34C - 2.16AB + 1.27AC + 0.35BC + 10.66B^2 - 0.43C^2$              | 27.70              |
| MC (% d.b.)                 | CS     | $1.71 - 0.050A + 0.15B - 0.14C - 0.012AB + 0.00083AC - 0.051BC - 0.24B^2 + 0.078C^2$          | 19.03              |
|                             | CS-C   | $1.95 - 0.079A + 0.12B - 0.14C - 0.029AB - 0.020AC - 0.030BC - 0.32B^2 + 0.0025C^2$           | 30.84              |
| AC (% d.b.)                 | CS     | $4.42 + 0.29A + 0.80B + 0.30C + 0.21AB - 0.075AC + 0.045BC - 0.18B^2 - 0.082C^2$              | 16.99              |
|                             | CS-C   | $4.05 + 0.66A + 0.85B + 0.35C + 0.31AB + 0.098AC + 0.10BC + 0.32B^2 - 0.015C^2$               | 20.17              |
| <i>d</i> <sub>gw</sub> (mm) | CS     | $0.34 - 0.012A - 0.031B - 0.011C + 0.011AB - 0.00075AC - 0.00438BC + 0.011B^2 + 0.00025C^2$   | 23.63              |
|                             | CS-C   | $0.48 - 0.010A - 0.030B - 0.012C + 0.0023AB + 0.00058AC + 0.00075BC + 0.0088B^2 - 0.00042C^2$ | 44.75              |
| BD (kg/m <sup>3</sup> )     | CS     | $177.27 + 6.38A + 42.74B + 8.40C + 2.26AB + 1.06AC + 3.39BC - 16.98B^2 - 0.11C^2$             | 52.40              |
|                             | CS-C   | $111.77 + 3.92A + 37.09B + 4.86C + 1.04AB + 1.01AC + 0.41BC - 20.04B^2 - 0.74C^2$             | 45.64              |
| PD (kg/m <sup>3</sup> )     | CS     | $1270.45 - 34.49A + 66.19B + 25.60C - 17.29AB - 17.55AC + 24.38BC - 50.28B^2 - 6.10C^2$       | 18.14              |
|                             | CS-C   | $1219.15 - 35.14A + 78.99B + 3.50C + 12.64AB - 16.62AC + 23.77BC - 62.34B^2 - 11.35C^2$       | 20.77              |

SY: solid yield; MC: moisture content; AC: ash content; BD: bulk density; PD: particle density; and *d*<sub>gw</sub>: geometric mean diameter; RSM: response surface methodology; A: torrefaction temperature (°C); B: biomass-biochar (the first number after torrefied biomass (T) is % CS, and the second is % of with or without biochar); C: residence time (min).

**Table S3** Validation results for the optimized responses for torrefied ground or chopped camelina straw with and without biochar.

| Sample | TT (°C) |        | BB |       | RT (min) |       | SY (%) |       | AC (% d.b.) |      | MC (% d.b.) |      |
|--------|---------|--------|----|-------|----------|-------|--------|-------|-------------|------|-------------|------|
|        | AV      | PV     | AV | PV    | AV       | PV    | AV     | PV    | AV          | PV   | AV          | PV   |
| CS     | 300     | 299.79 | 20 | 19.97 | 20       | 19.55 | 45.18  | 45.12 | 5.84        | 5.73 | 1.45        | 1.44 |
| CS-C   | 300     | 299.61 | 20 | 19.90 | 20       | 19.96 | 44.63  | 44.42 | 6.83        | 6.72 | 1.47        | 1.47 |

AV: actual value; PV: predicted value; SY: solid yield; MC: moisture content; AC: ash content; BD: bulk density; PD: particle density; TT: torrefaction temperature; RT: residence time; and BB: biomass-biochar (the first number after torrefied biomass (T) is % CS, and the second is % of with or without biochar).

A.

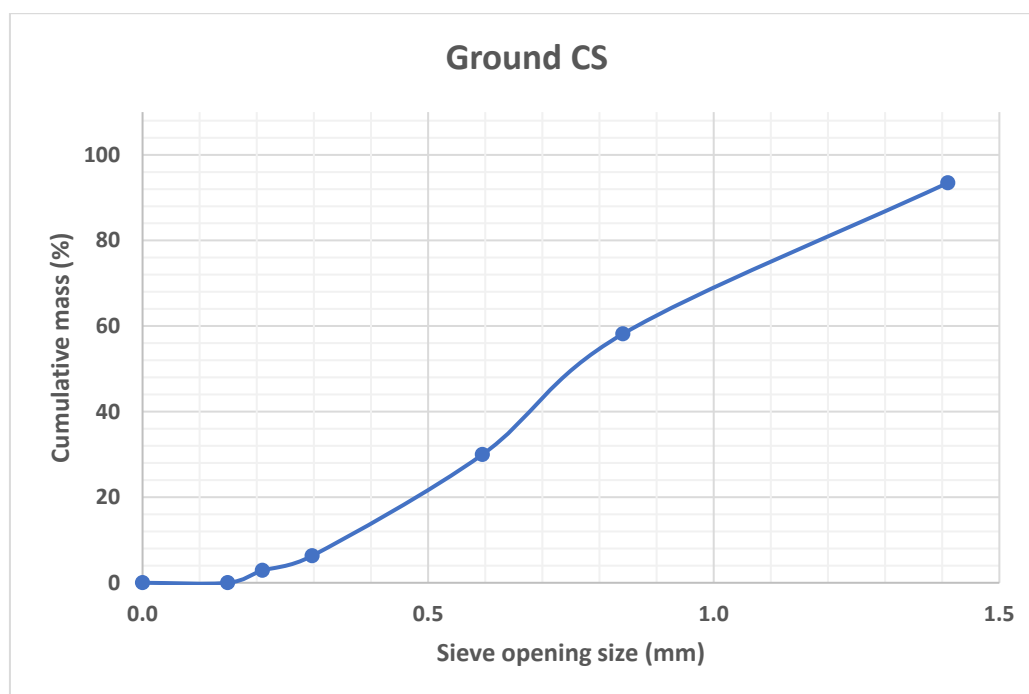

B.

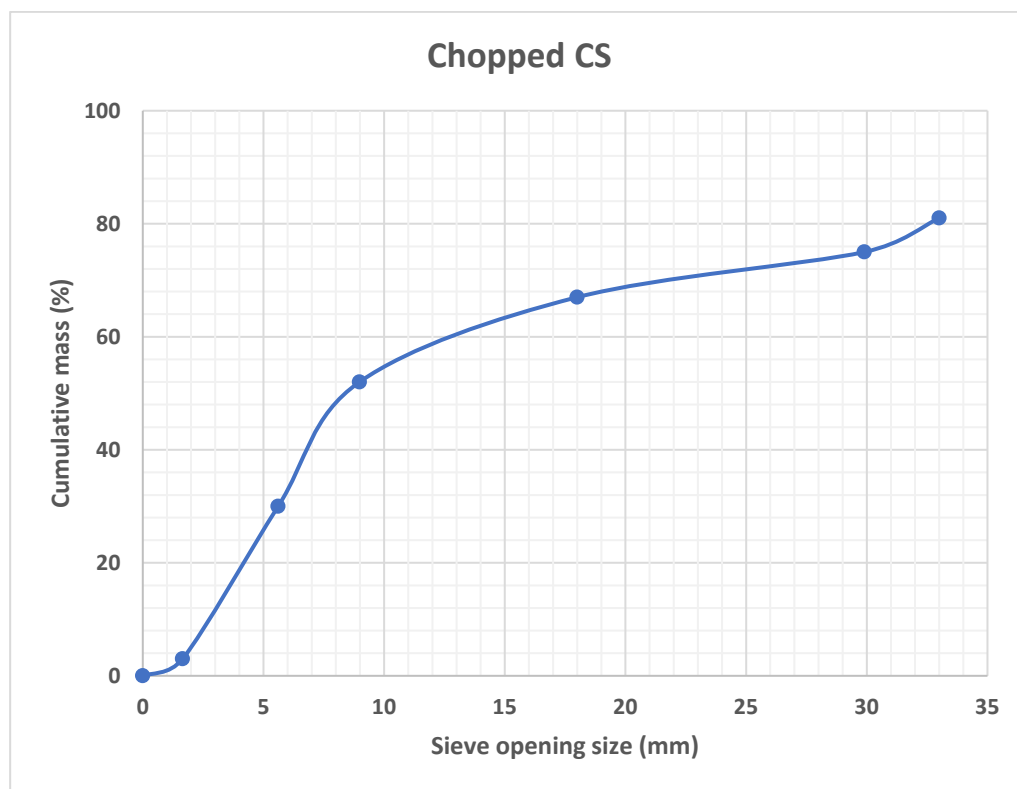

**Figure S1.** Cumulative passing plots of particle size for non-torrefied camelina straw (CS). (A) ground in 6.4 mm sieve size and (B) chopped.

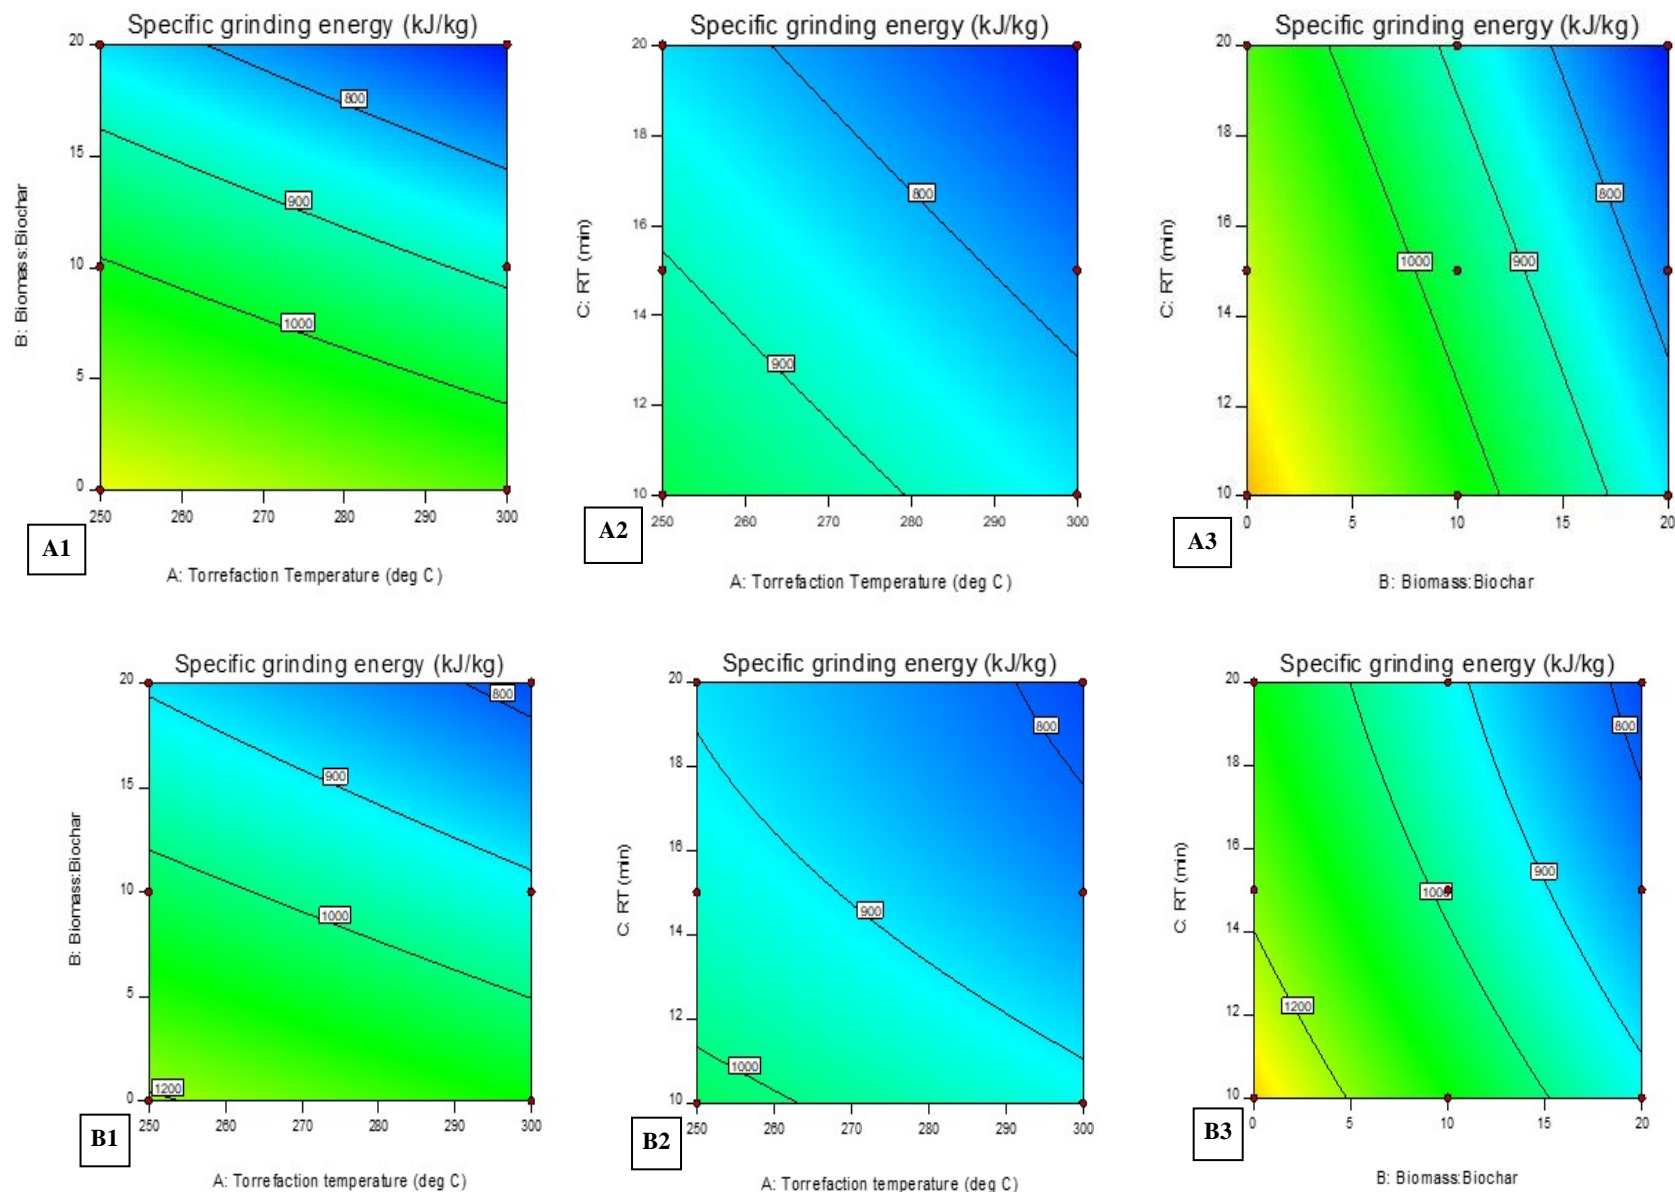

**B.**

**Figure S2.** Contour plots specific grinding energy (kJ/kg) as a function of torrefaction temperature (°C) (A1 – B1), biomass-biochar (A2 – B2) and residence time (min) (A3 – B3) for torrefied ground camelina straw with and without biochar (A) and torrefied chopped camelina straw with and without biochar (B).
